# Supplementary material for: Electronic structures of multilayer two-dimensional silicon carbide with oriented misalignment
Source: Royal Society of Chemistry journal article supplement (doi:10.1039/c5tc01679g), 2015-01-01
Supplement: c5tc01679g1.pdf [file c5tc01679g1.pdf]

Supporting information for  
“Electronic structures of multilayer two-dimensional silicon carbide  
with oriented misalignment”

Xiao Lin, Shisheng Lin, Yang Xu, and Hongsheng Chen

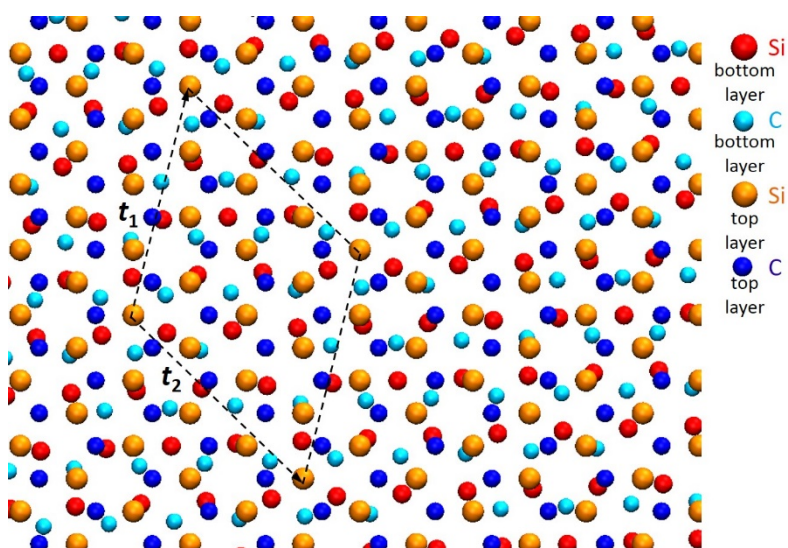

**Fig. S1** Schematics of the atomic structure of bilayer 2d-SiC with oriented misalignment. The rotation angle is  $27.8^\circ$ . The commensuration cell is marked by the dashed lines, with the primitive vectors for the super-lattice denoted as  $t_1$  and  $t_2$ , respectively. The atom number in the commensuration cell in each layer is  $N = 26$ .

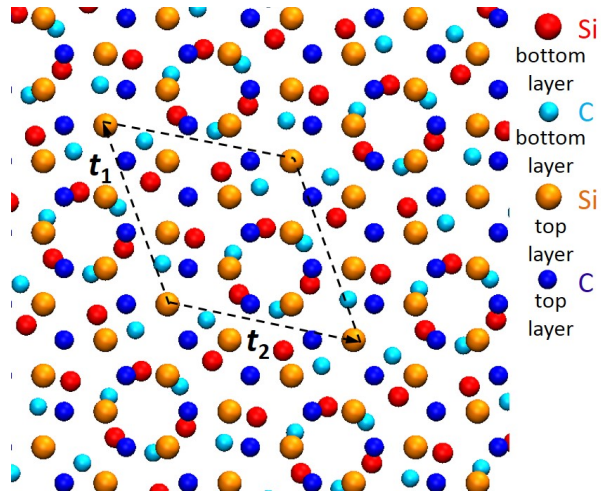

**Fig. S2** Schematics of the atomic structure of bilayer 2d-SiC with oriented misalignment. The rotation angle is  $21.8^\circ$ . The commensuration cell is marked by the dashed lines, with the primitive vectors for the super-lattice denoted as  $t_1$  and  $t_2$ , respectively. The atom number in the commensuration cell in each layer is  $N = 14$ .

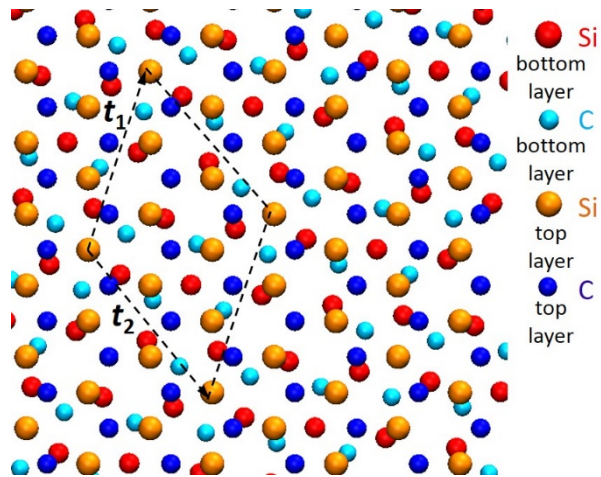

**Fig. S3** Schematics of the atomic structure of bilayer 2d-SiC with oriented misalignment. The rotation angle is  $38.2^\circ$ . The commensuration cell is marked by the dashed lines, with the primitive vectors for the super-lattice denoted as  $t_1$  and  $t_2$ , respectively. The atom number in the commensuration cell in each layer is  $N = 14$ .

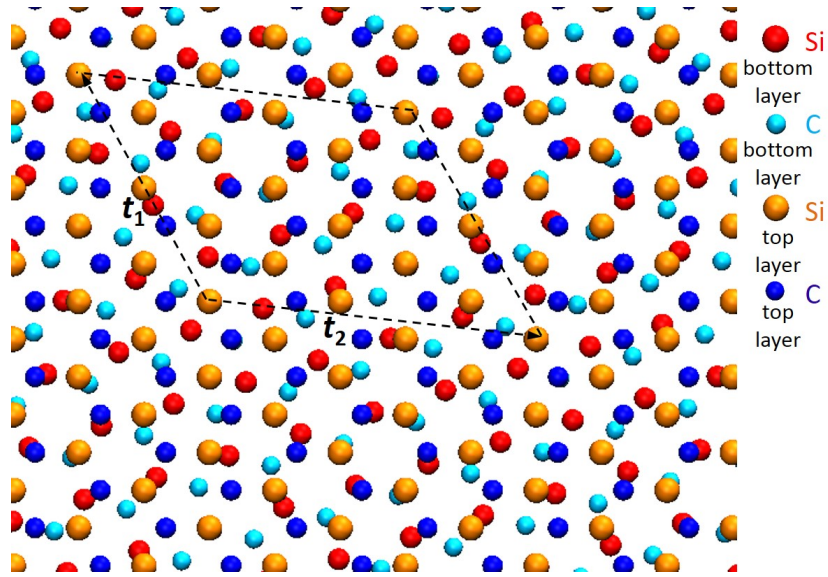

**Fig. S4** Schematics of the atomic structure of bilayer 2d-SiC with oriented misalignment. The rotation angle is  $13.2^\circ$ . The commensuration cell is marked by the dashed lines, with the primitive vectors for the super-lattice denoted as  $t_1$  and  $t_2$ , respectively. The atom number in the commensuration cell in each layer is  $N = 38$ .

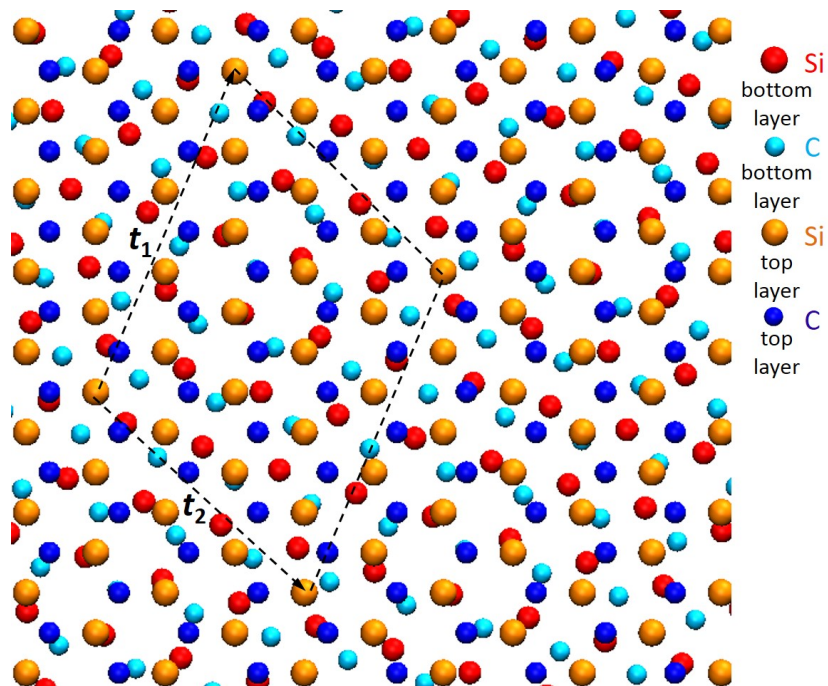

**Fig. S5** Schematics of the atomic structure of bilayer 2d-SiC with oriented misalignment. The rotation angle is  $46.8^\circ$ . The commensuration cell is marked by the dashed lines, with the primitive vectors for the super-lattice denoted as  $t_1$  and  $t_2$ , respectively. The atom number in the commensuration cell in each layer is  $N = 38$ .

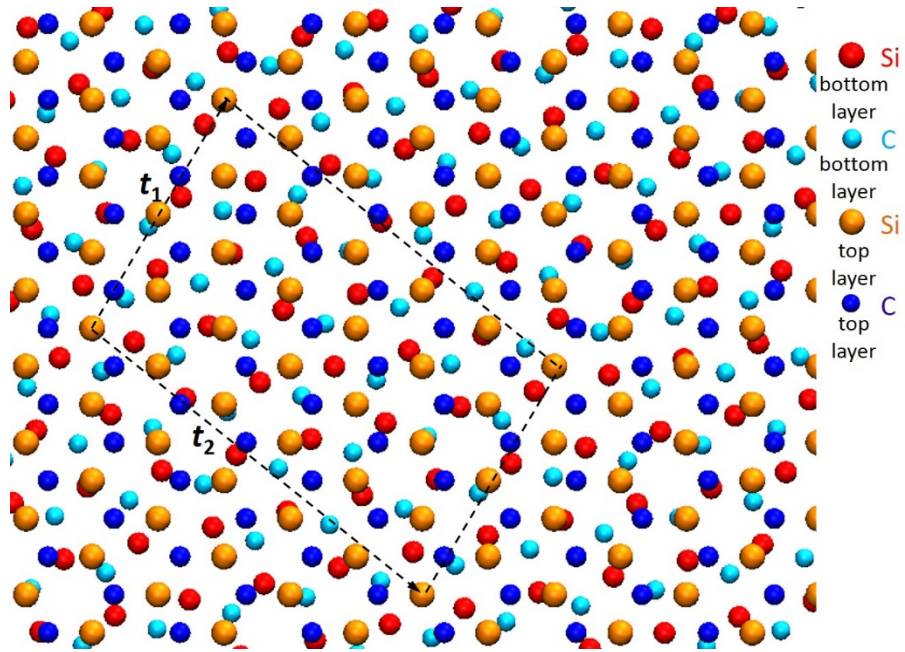

**Fig. S6** Schematics of the atomic structure of bilayer 2d-SiC with oriented misalignment. The rotation angle is  $17.9^\circ$ . The commensuration cell is marked by the dashed lines, with the primitive vectors for the super-lattice denoted as  $t_1$  and  $t_2$ , respectively. The atom number in the commensuration cell in each layer is  $N = 62$ .

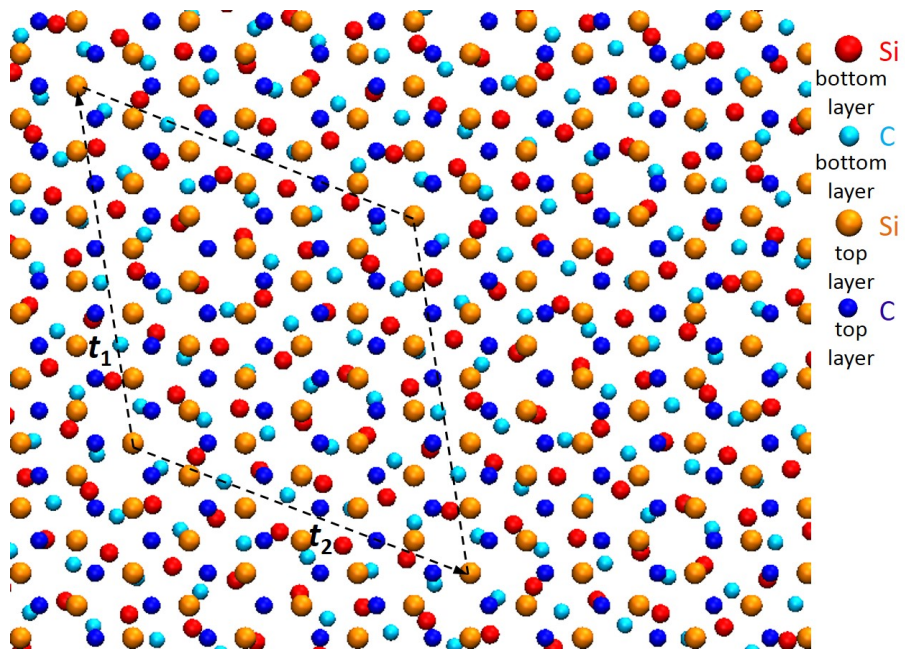

**Fig. S7** Schematics of the atomic structure of bilayer 2d-SiC with oriented misalignment. The rotation angle is  $42.1^\circ$ . The commensuration cell is marked by the dashed lines, with the primitive vectors for the super-lattice denoted as  $t_1$  and  $t_2$ , respectively. The atom number in the commensuration cell in each layer is  $N = 62$ .
